# Supplementary material
Source: HighWire-hosted journal article supplement (https://ard.bmj.com/content/82/5/670)
Supplement: inline-supplementary-material-11 [file inline-supplementary-material-11.xlsx]

## Sheet: Sheet1
Supplementary Table 8
Antigen
APRIL
BAFF
BDNF
EGF
EPO
GCSF
GM-CSF
HGF
HGH
IFN-beta
IFN-gamma
IFN-omega
IL-10
IL-11
IL-12p40
IL-12p70
IL-13
IL-15
IL-16
IL-17A Peprotech
IL-17B
IL-17D
IL-17E
IL-17F
IL-1b
IL-2
IL-20
IL-21
IL-22
IL-23
IL-27
IL-3
IL-4
IL-5
IL-6
IL-7
IL-8
IL-9
M-CSF
MCP1 (CCL2)
NOG
OSM
SCF
TGFB1
TGFB2
TGFB3
TNF-beta
TNF-alpha
TPO
TSLP
VEGF 121
VEGF 165
sCD40 Ligand/TRAP
IFN-L1/IL-29
IFN-L2/IL-28A
CCL1
CCL24/Eotaxin-2
CXCL16
BCA-1/BLC/CXCL13
CCL3
CCL5
SPARC
TARC
ANG2
EGFR
MDC
MIP3
MIF
MMP-3
TWEAK
BMP4
IL-17A RnD
CXCL4
IL-18
IL-26 monomer
PDGFR-A
CX3CL1
HMGB1
CTGF
TGFB RIII
TNC
sTNF RI/TNFRSF1A
IFN-alpha2A
TNF RII
VEGF
VEGFR2
MMP-7
ISG15
Fibrinogen 1
NPM1(B23)
RPP30
FBL
KLK5
SAE1
DSG1
DSG4
U1-snRNP 68
U1-snRNP A
U1-snRNP C
La/SSB
Ro 60/SS-A (bovine)
Ro 60/SS-A (recombinant)
Ro 52/SSA
genomic double-stranded DNA
plasmid double-stranded DNA
Sm/RNP (SRC-3000)
Smith (SMA-3000)
U-snRNP B/B'
Histone H1 (His-1001)
Histone H2a & H4 (His-1002)
Histone H2b (His-1003)
Histone H3 (His-1004)
Whole Histone (His-1000)
Jo-1 (Histidyl-tRNA synthetase)
Kup70/p80
PCNA
Ribosomal phosphoprotein P0
Ribosomal phosphoprotein P1
Ribosomal phosphoprotein P2
CENP B
CENP A
PM/Scl 100
PL-7
PL-12
Elastase
Azurocidin
BPI Arotec
Mi-2
TG
TPO (Thyroperoxidase)
LC1
LKM1
b2GP I
Actin
Scl-70truncated
GBMundissociated
GBMdissociated
Hsp70
Hsp90
Grp78 (HSPa5 or BiP)
Hsp47 (Colligin)
Hsp25
Hsp60
Scl-70full-length
MMP-9
NGAL
Intrinsic Factor
tissue Transglutaminase
PM/Scl 75
Annexin V
MPO
PR3
SRP54
C1q
LAMP-2
M2 Antigen
BCOADC-E2
PDC-E2
gp210
Sp 100
Annexin V
BPI Diarect
Nup62
SmD1
SmD2
SmD3
SmD
MDA5
B2-Glycoprotein I
b2GP I non-recom. Human
b2GP I non-recom. Bovine
Gliadin
GP2
EJ (Glycycl-tRNA synthetase)
TIF1-gamma
Nucleolin
Parietal Cell antigen
Cardiolipin (C1649)
Cardiolipin (C0563)
Aggrecan
Aggrecan
Fibrinogen type I-S
Fibrinogen type IV
Fibrinogen type I
Laminin
single-stranded DNA
Aldolasetype X
Vimentin
Bare bead
Myosin
Collagen type IV
Collagen type VI
Human HDL
MDA-modified human LDL
Pyruvate dehydrogenase (PDH)
ECL-CAM
Human Insulin
Lipoprotein Lipase
Proteoglycans
EBV EA-D
EBV EA
EBV EBNA-1
EBV P18
Collagen I
Collagen V
POLR3H
Catalase
Bare bead
XRCC4
LIG4
NHEJ1
Ku80 (XRCC5)
DNA PKcs (PRKDC)
GSN
Lactotransferrin (lactoferrin)
Lysozyme
Cathepsin G
RPP25
RPP14
U11/U12 RNP
MORC3
PDGFR-B
Enolase
heparan sulfate
Oxidized human LDL
Hepatitis B Surface Antigen (HBSAg)
Collagen type II
Collagen type VIII
Collagen type IX
Collagen type X
a-actinin
deoxy. 30ug
deoxy. 15ug
deoxy. 5ug
glutathion 10ug
Bare bead
fibrinogen 10ug
myosin 10ug
deoxy. 30ug in MES
deoxy. 15ug in MES
deoxy. 5ug in MES
CENP A in MES
EGF in MES
HMGB1 in MES
PDGFR-A in MES
KIF15 in MES
NT5C1A in MES
CHIC1 in MES
NT5C1A in MES
ZNF688 in MES
TRIM33 in MES
Bare bead in MES
IgG from human serum D1
IgG from human serum D2
IgG from human serum D3
ChromPure Human IgGFc fragment D1
ChromPure Human IgGFc fragment D2
ChromPure Human IgGFc fragment D3
human IgE D1
human IgE D2
human IgE D3
IgM from human serum D1
IgM from human serum D2
IgM from human serum D3
IgA from human colostrum D1
IgA from human colostrum D2
IgA from human colostrum D3
AffiniPure Goat Anti-Human IgGF(ab') fragment specific D1
AffiniPure Goat Anti-Human IgGF(ab') fragment specific D2
AffiniPure Goat Anti-Human IgGF(ab') fragment specific D3
AffiniPure Fab Fragment Goat Anti-Human IgG (H+L) D1
AffiniPure Fab Fragment Goat Anti-Human IgG (H+L) D2
AffiniPure Fab Fragment Goat Anti-Human IgG (H+L) D3
AffiniPure Rabbit Anti-Human IgG (H+L) D1
AffiniPure Rabbit Anti-Human IgG (H+L) D2
AffiniPure Rabbit Anti-Human IgG (H+L) D3
AffiniPure Goat Anti-Human IgGFc Fragment Specific D1
AffiniPure Goat Anti-Human IgGFc Fragment Specific D2
AffiniPure Goat Anti-Human IgGFc Fragment Specific D3
AffiniPure Rabbit Anti-Human IgG + IgM (H+L) D1
AffiniPure Rabbit Anti-Human IgG + IgM (H+L) D2
AffiniPure Rabbit Anti-Human IgG + IgM (H+L) D3
Goat Anti-Human IgMMouse/Bovine/Horse SP ads-UNLB D1
Goat Anti-Human IgMMouse/Bovine/Horse SP ads-UNLB D2
Goat Anti-Human IgMMouse/Bovine/Horse SP ads-UNLB D3
AffiniPure Goat Anti-Human IgMFc5 fragment specific D1
AffiniPure Goat Anti-Human IgMFc5 fragment specific D2
AffiniPure Goat Anti-Human IgMFc5 fragment specific D3
