# Supplementary material
Source: HighWire-hosted journal article supplement (https://ard.bmj.com/content/82/5/670)

A

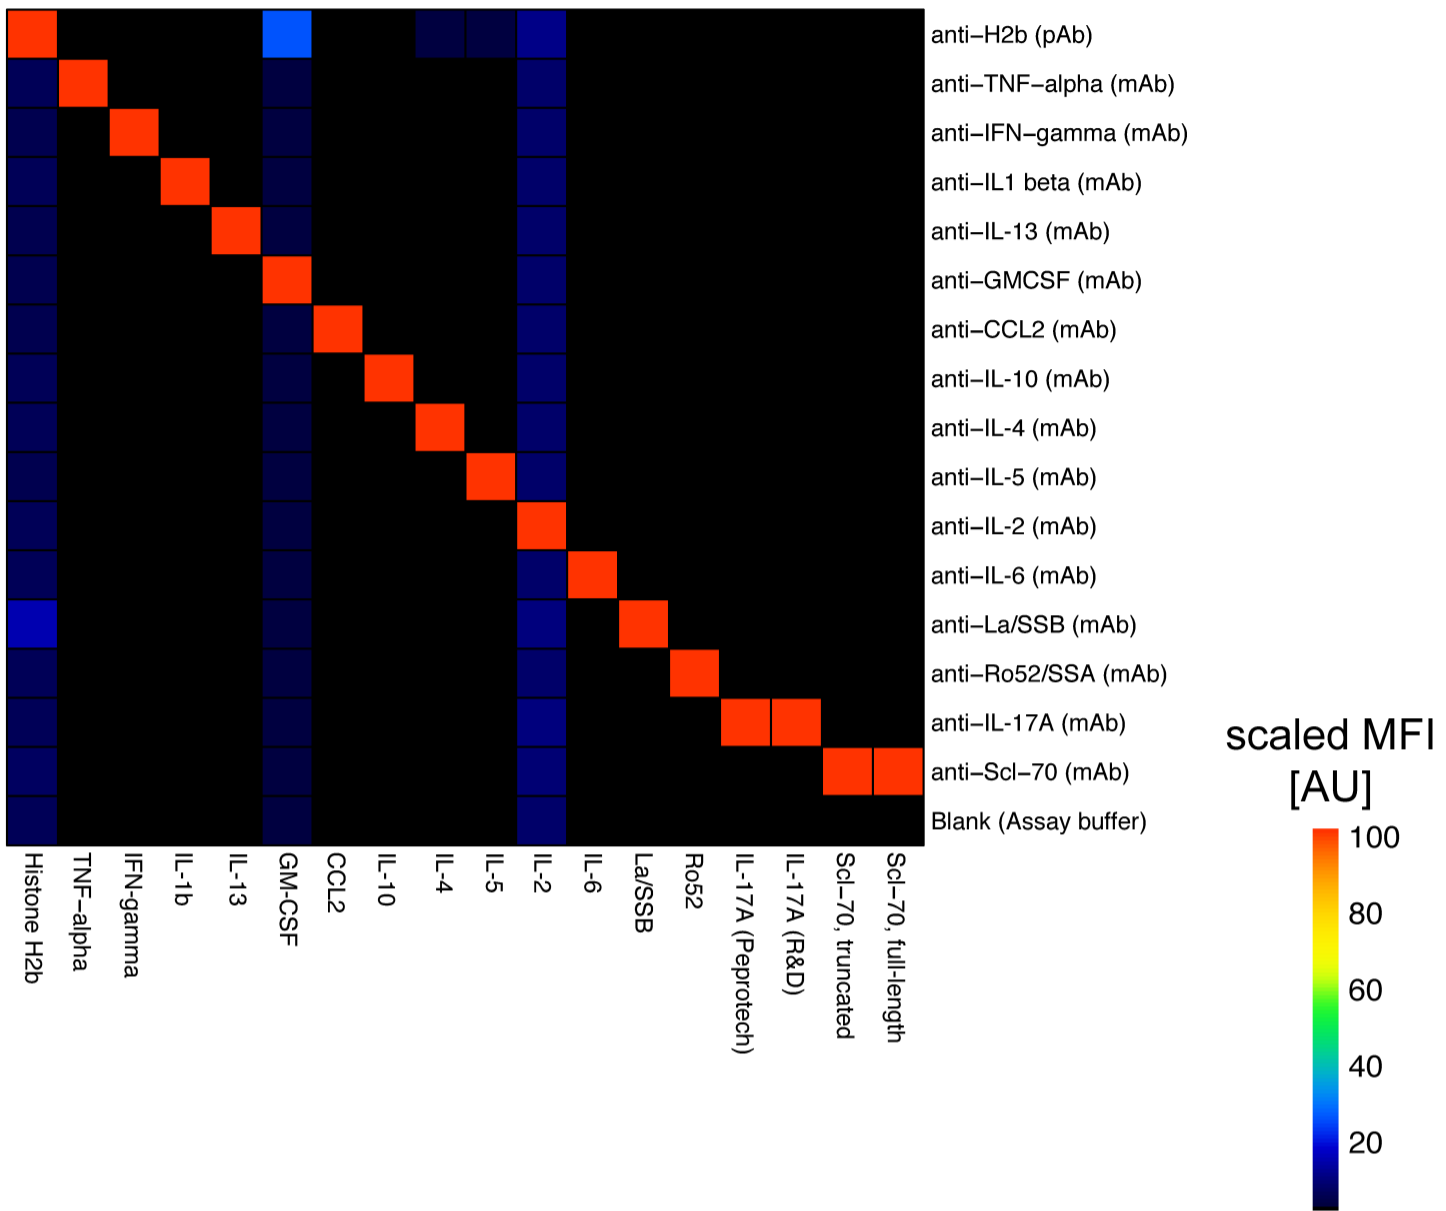

B

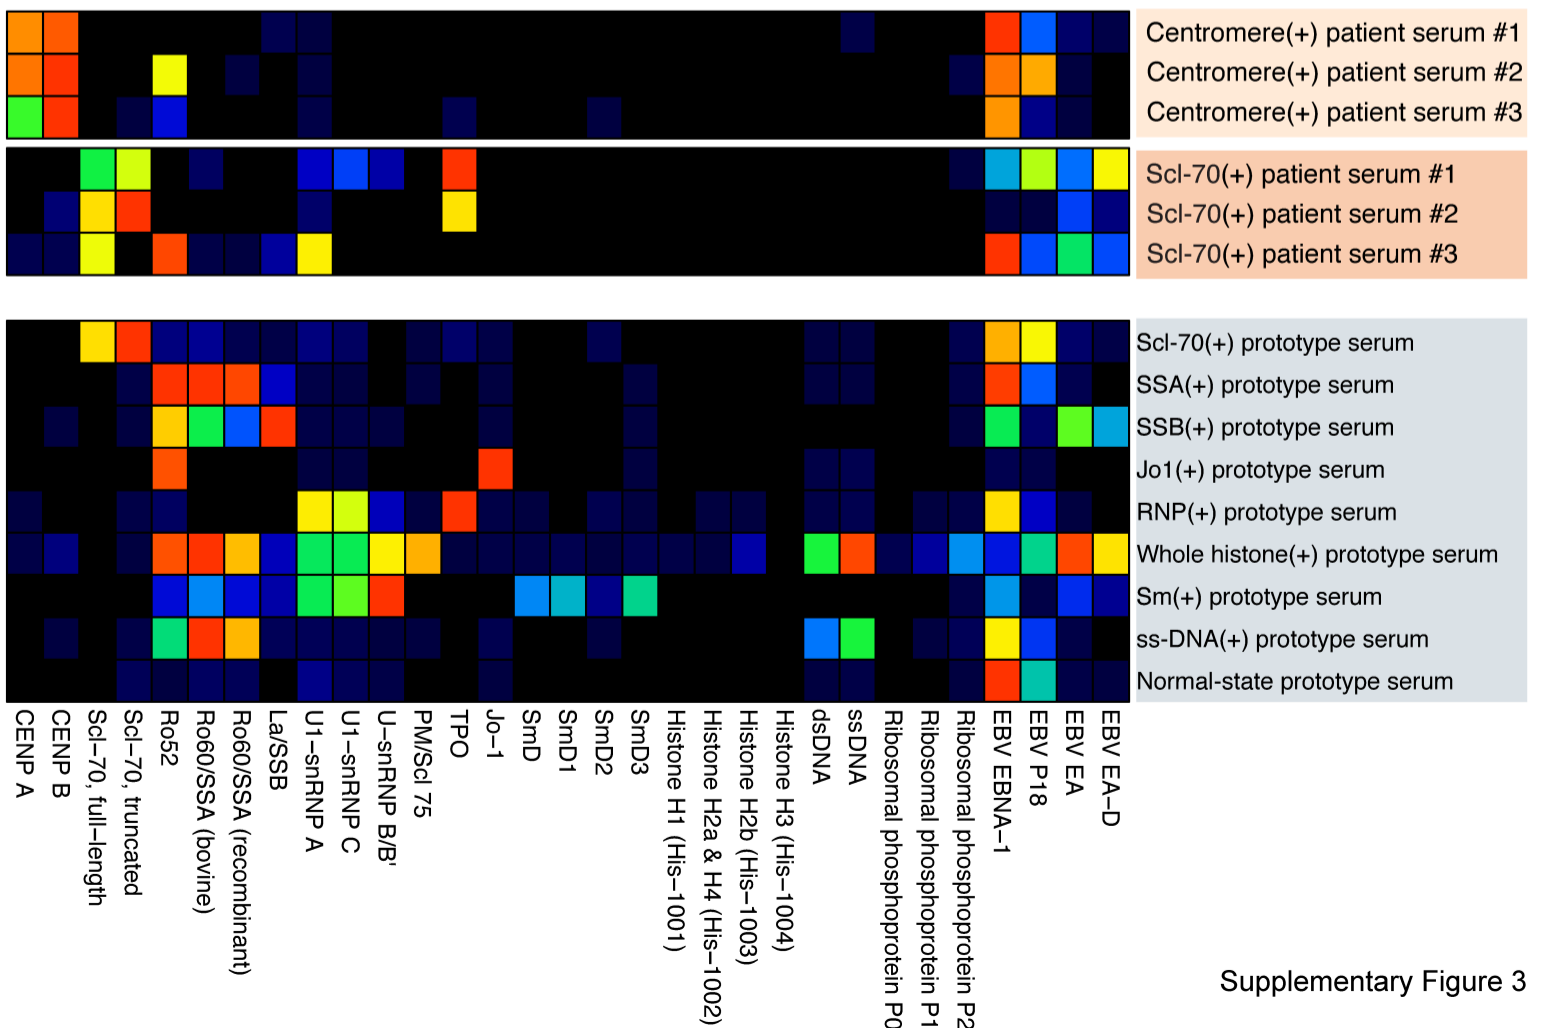

Supplementary Figure 3

Supplement: inline-supplementary-material-12 [file inline-supplementary-material-12.pdf]

### Ro60

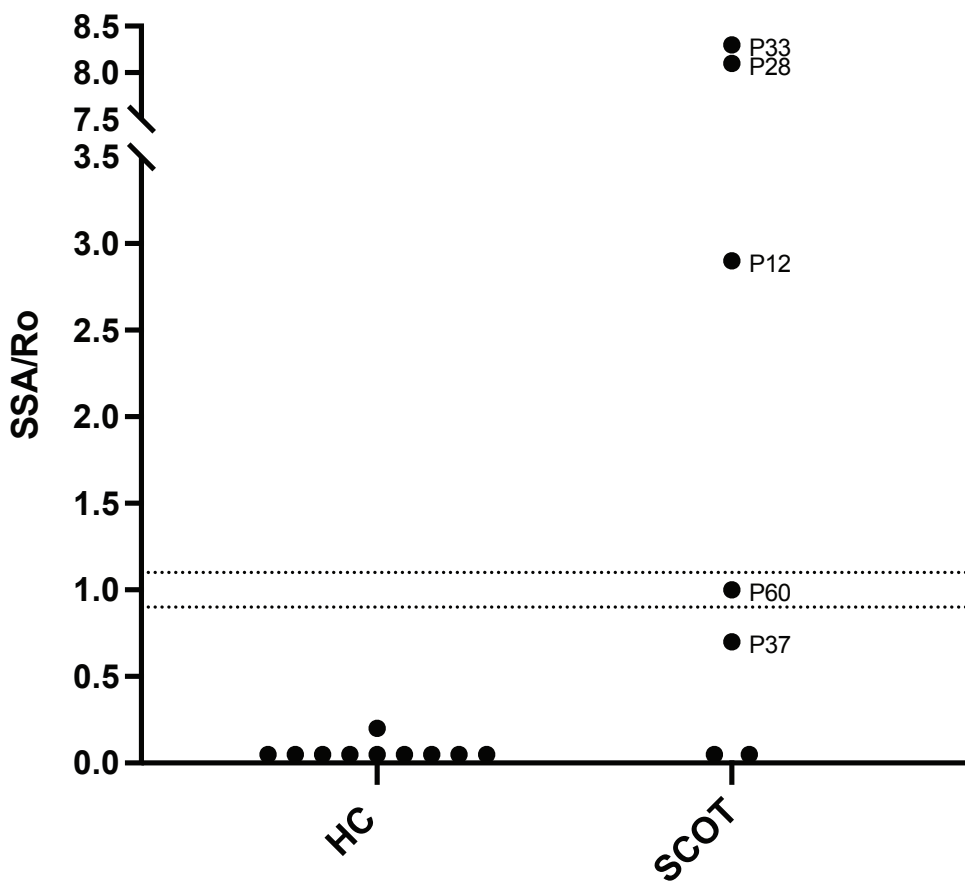

### Luminex vs Bioplex for Ro60

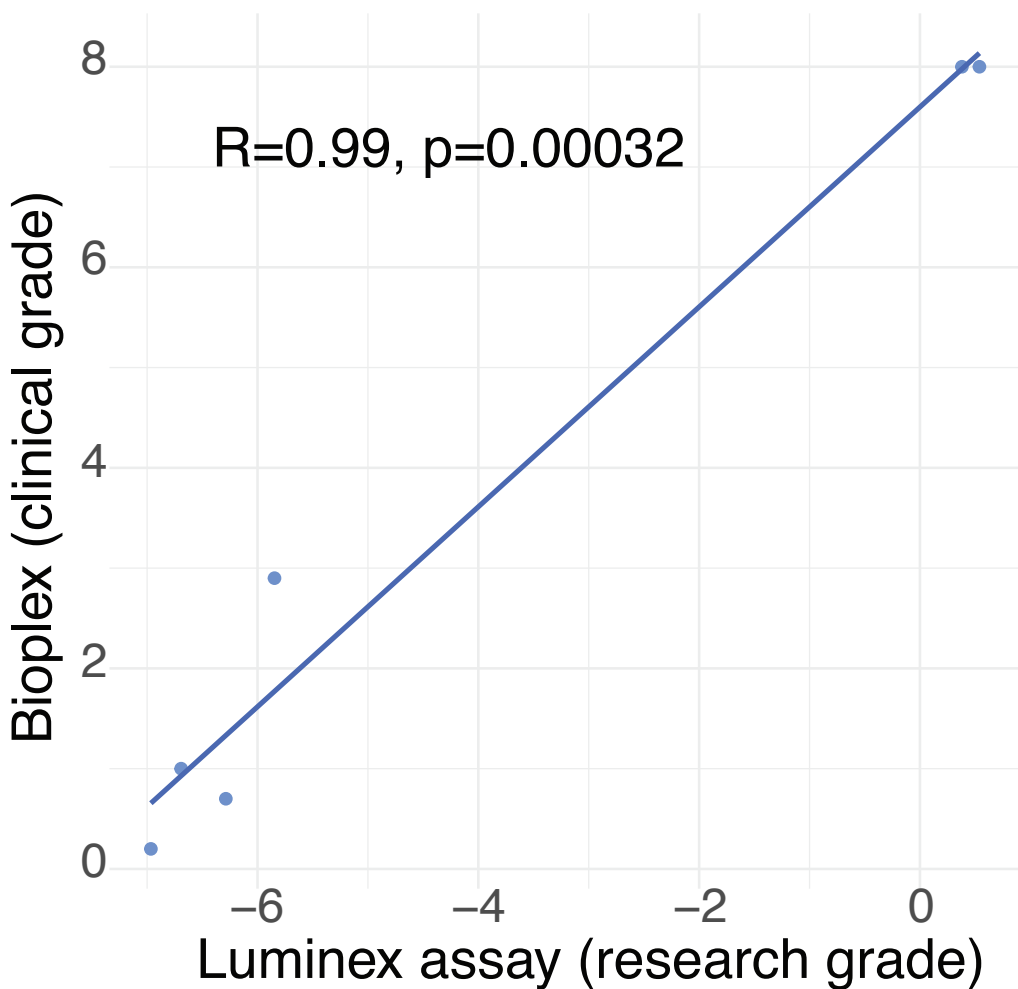

Supplement: inline-supplementary-material-13 [file inline-supplementary-material-13.pdf]

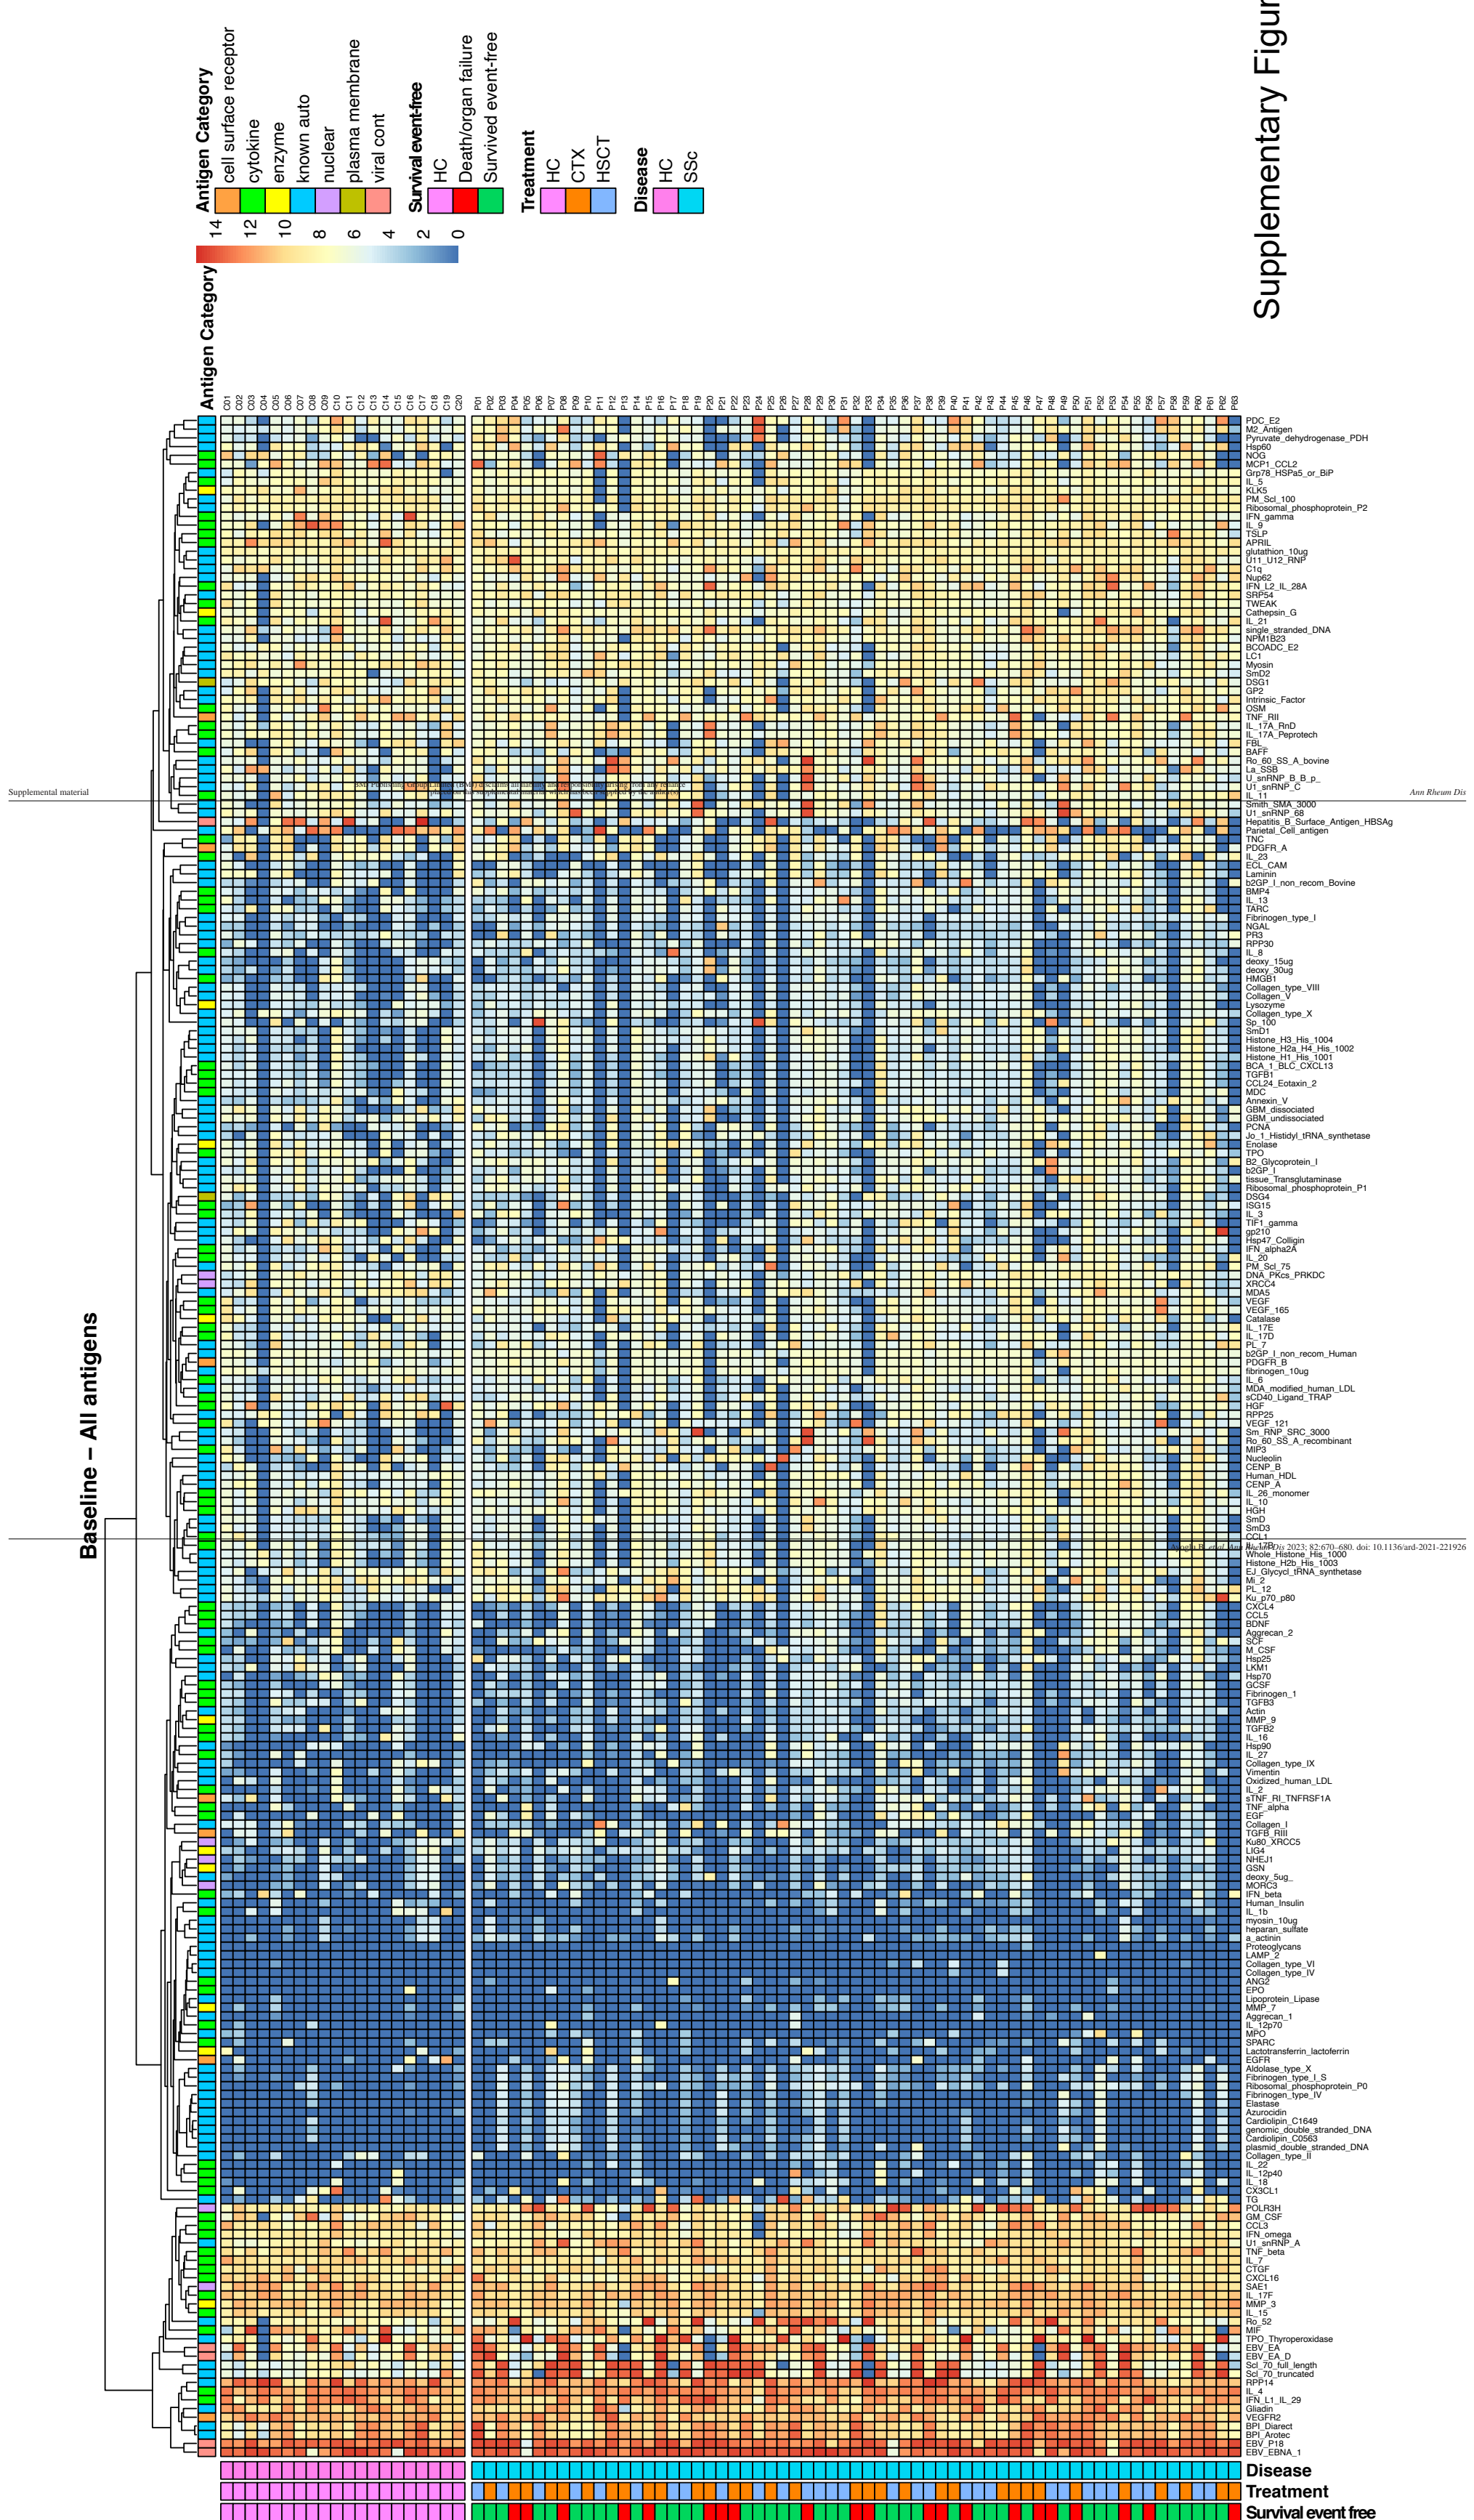

Supplement: inline-supplementary-material-3 [file inline-supplementary-material-3.pdf]

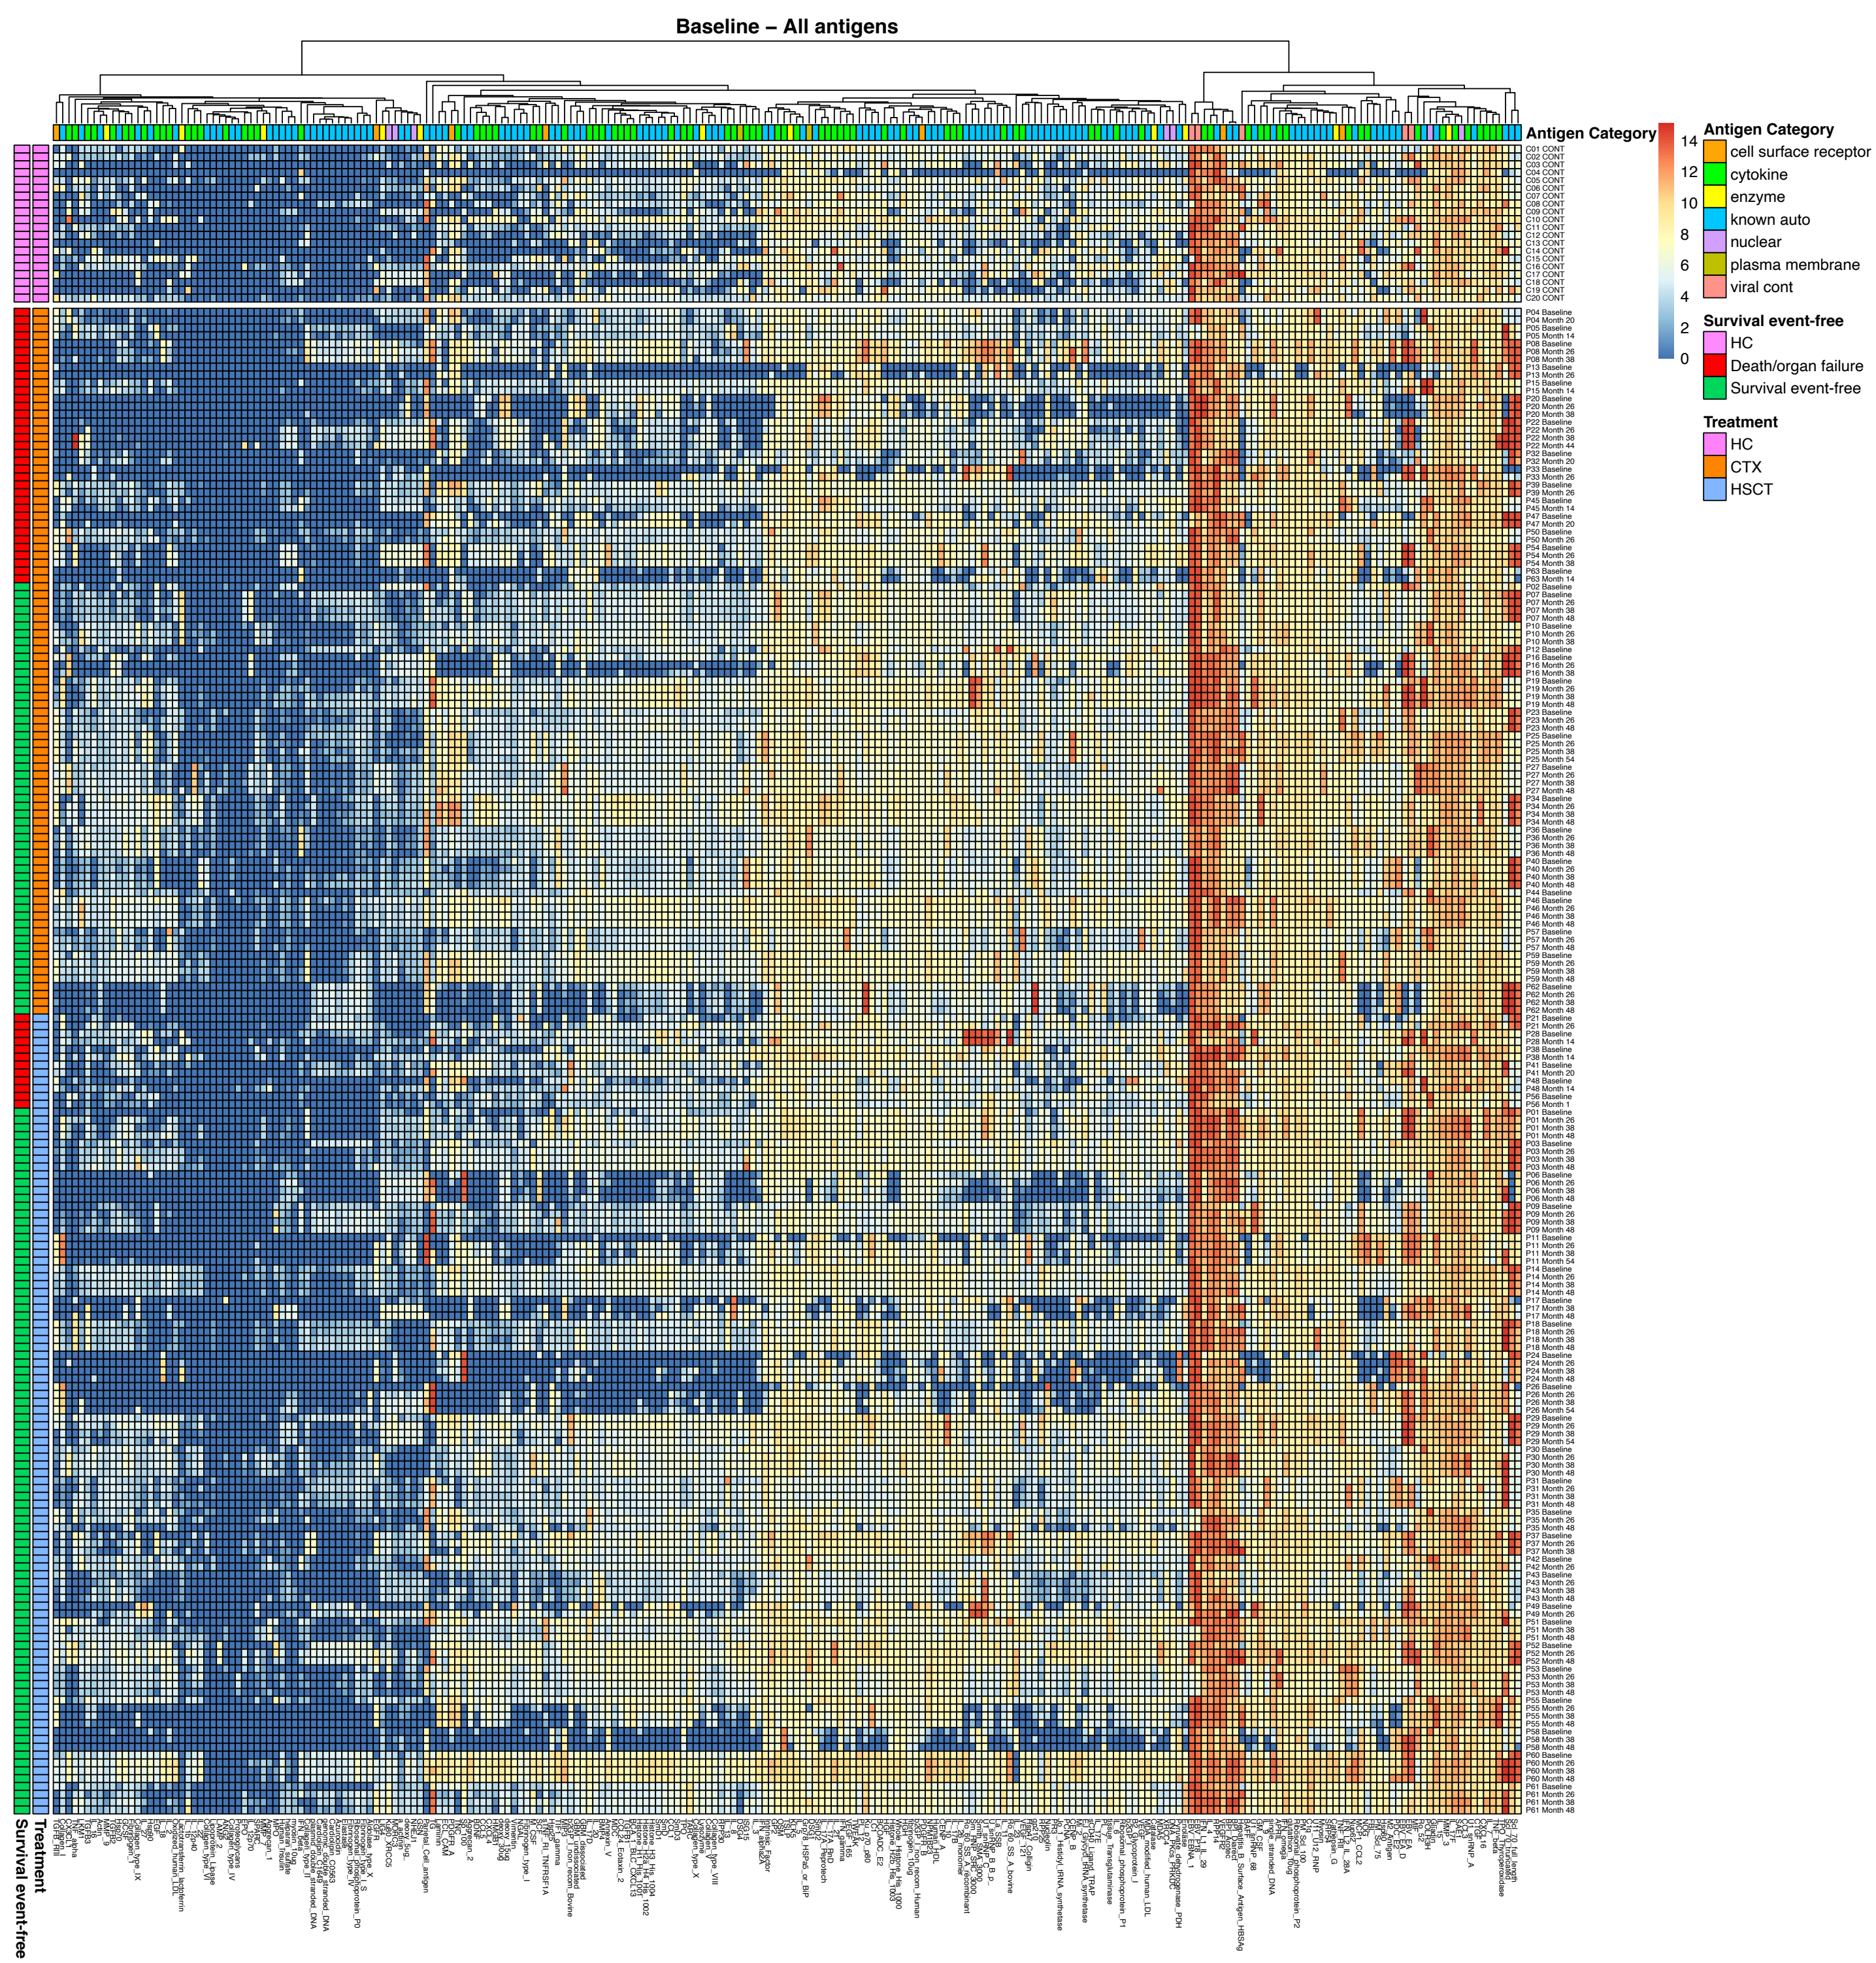

Supplementary Figure 2

Supplement: inline-supplementary-material-4 [file inline-supplementary-material-4.pdf]
